# Supplementary material for: Heterogeneous glacier thinning patterns over the last 40 years in Langtang Himal
Source: Copernicus journal article supplement (doi:10.5194/tc-2016-25), 2016-02-05
Supplement: Supplementary file 1 [file tc-2016-25-supplement.pdf]

## 1 Supplementary Figures and Tables

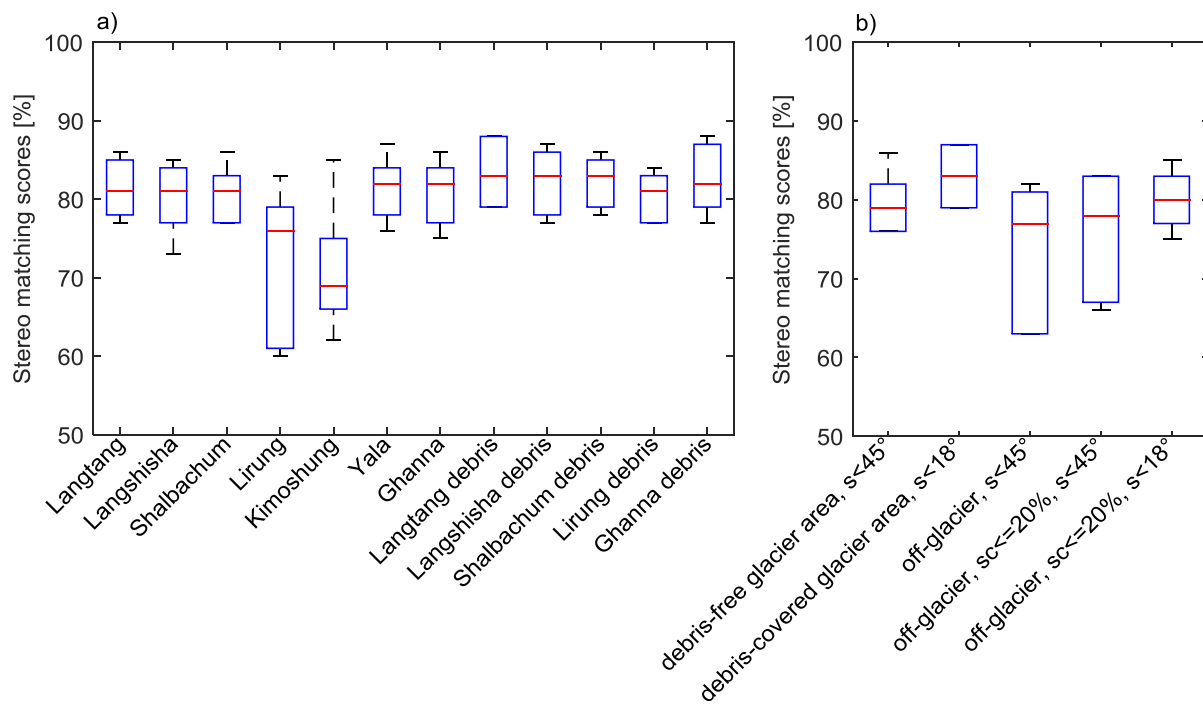

2

3 Figure S1: Ensemble of stereo matching scores per a) individual glacier and debris-covered  
4 area and of b) overall glacier / debris-covered area and off-glacier terrain. On each box, the  
5 central mark is the median of all DEMs (except Hexagon 1974 and WorldView 2015 DEMs  
6 for which matching scores are not available). The edges of each box are the 25th and 75th  
7 percentiles. The whiskers extend to the most extreme data points. The threshold slopes ( $s$ ) of  
8 considered areas in b) correspond to the 95th percentile of glacier slopes ( $45^\circ$ ) and the 95th  
9 percentile of debris-covered glacier slopes ( $18^\circ$ ), respectively.  $sc$  is the monsoon snow-cover  
10 frequency.



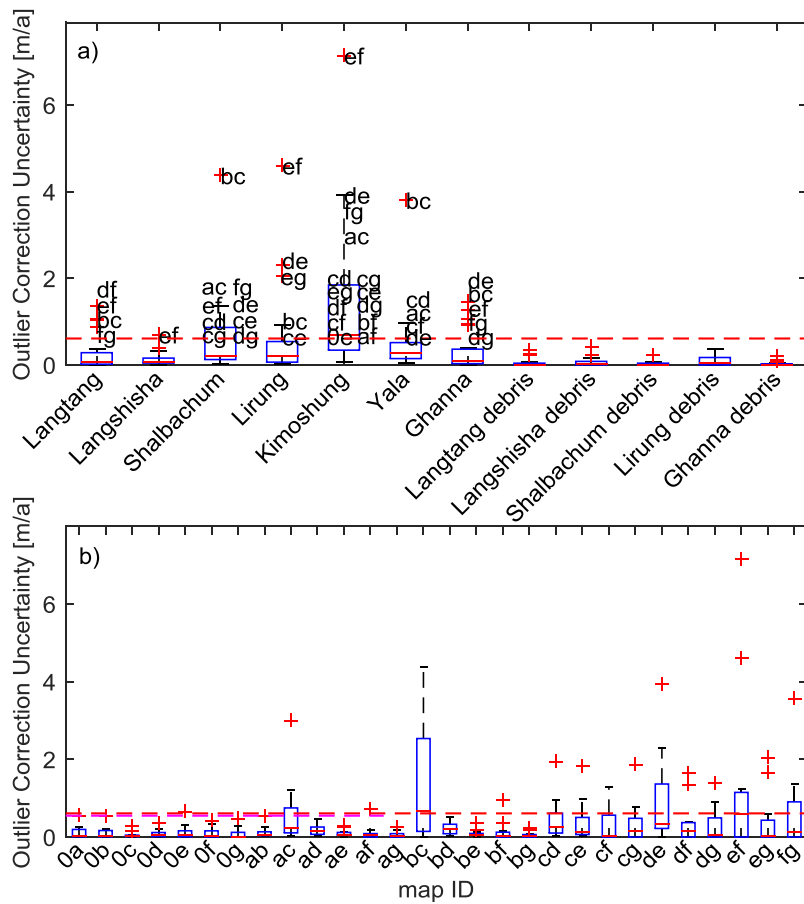

1  
2  
3  
4  
5  
6  
7  
8  
9

Figure S3: Ensemble of outlier correction uncertainties per individual glaciers and debris-covered area (a) and ensemble of outlier correction uncertainties per  $\Delta h/\Delta t$  map (b). On each box, the central mark is the median of all  $\Delta h/\Delta t$  maps (a) or of all glaciers / debris-covered areas (b), respectively. The edges of the box are the 25th and 75th percentiles. The dashed red lines represent the threshold set for outlier elimination (0.61 m/a). Outliers are labelled in (a) by the corresponding map IDs. Map IDs are constituted of the corresponding DEM IDs (Table 4).

- 1 Table S1: Overview of  $\Delta h/\Delta t$  map outliers, ST: stable terrain uncertainty (Figure 4), U: DEM adjustment uncertainty (Figure S2), O: outlier  
 2 correction uncertainty (Figure S3), D: data availability (Figure 5b, in brackets: data availability >50% but the glacier is not entirely represented  
 3 on the scene). Map IDs are constituted of the corresponding DEM IDs (Table 4).

| Map ID |    | Langtang | Langshisha | Shalbachum | Lirung | Kimoshung | Yala  | Ghanna | Langtang debris | Langshisha debris | Shalbachum debris | Lirung debris | Ghanna debris |
|--------|----|----------|------------|------------|--------|-----------|-------|--------|-----------------|-------------------|-------------------|---------------|---------------|
|        | ST | U O D    | U O D      | U O D      | U O D  | U O D     | U O D | U O D  | U O D           | U O D             | U O D             | U O D         | U O D         |
| 0a     |    |          |            |            |        | x         |       |        |                 |                   |                   |               |               |
| 0b     |    |          |            |            |        |           |       |        |                 |                   |                   |               |               |
| 0c     |    |          | (x)        |            |        |           |       |        |                 | (x)               |                   |               |               |
| 0d     |    | (x)      |            |            |        |           |       |        | (x)             |                   |                   |               |               |
| 0e     |    |          |            |            |        |           |       |        |                 |                   |                   |               |               |
| 0f     |    |          |            |            |        |           |       |        |                 |                   |                   |               |               |
| 0g     |    |          |            |            |        |           |       |        |                 |                   |                   |               |               |
| ab     |    |          |            |            |        | x         |       |        |                 |                   |                   |               |               |
| ac     | x  |          | (x)        | x          | x      | x         | x     | x      |                 | (x)               |                   |               |               |
| ad     |    | (x)      |            |            |        |           |       |        | (x)             |                   |                   |               |               |
| ae     |    |          |            |            |        |           |       |        |                 |                   |                   |               |               |
| af     |    |          |            |            |        |           |       |        |                 |                   |                   |               |               |
| ag     |    |          |            |            |        |           |       |        |                 |                   |                   |               |               |
| bc     | x  | x        | (x)        | x          | x      | x         | x     | x      |                 |                   | (x)               |               |               |
| bd     |    | (x)      |            |            |        |           |       |        | (x)             |                   |                   |               |               |
| be     |    |          |            |            |        |           |       |        |                 |                   |                   |               |               |
| bf     |    |          |            |            |        |           |       |        |                 |                   |                   |               |               |
| bg     |    |          |            |            |        |           |       |        |                 |                   |                   |               |               |
| cd     | x  | (x)      | (x)        | x          |        |           | x     | x      | (x)             | (x)               |                   |               |               |
| ce     | x  |          | (x)        | x          | x      | x         |       | x      |                 | (x)               |                   |               |               |
| cf     | x  |          | (x)        |            |        |           |       | x      |                 |                   |                   |               |               |
| cg     | x  |          | (x)        | x          |        |           |       | x      |                 | (x)               |                   |               |               |
| de     | x  | x        | (x)        | x          | x      |           | x     | x      | x               | (x)               | x                 | x             | x             |
| df     |    | x        | (x)        |            |        |           | x     | x      | x               | (x)               |                   |               |               |
| dg     |    | x        | (x)        | x          | x      |           |       | x      | x               | (x)               | x                 |               |               |
| ef     | x  | x        |            | x          | x      |           | x     | x      |                 |                   | x                 | x             | x             |
| eg     | x  |          |            | x          |        |           | x     | x      |                 |                   | x                 | x             | x             |
| fg     |    | x        |            | x          |        |           | x     | x      |                 |                   | x                 |               |               |
